# Supplementary material for: Supervised learning using routine surveillance data improves outbreak detection of Salmonella and Campylobacter infections in Germany
Source: PubMed Central journal article supplement (PMC9070876; doi:10.1371/journal.pone.0267510), 2022-05-05

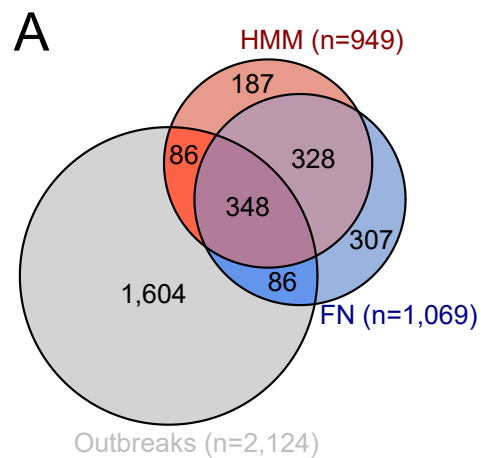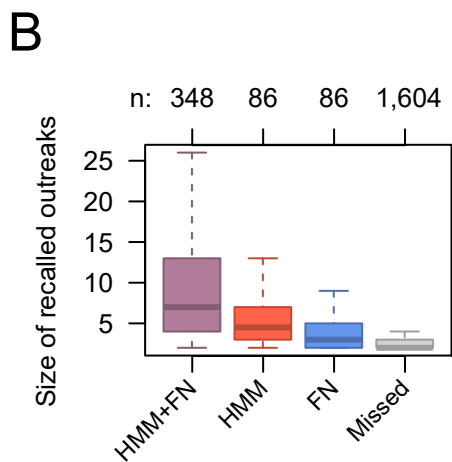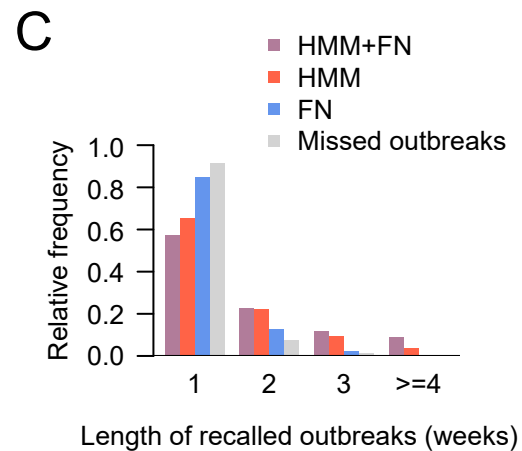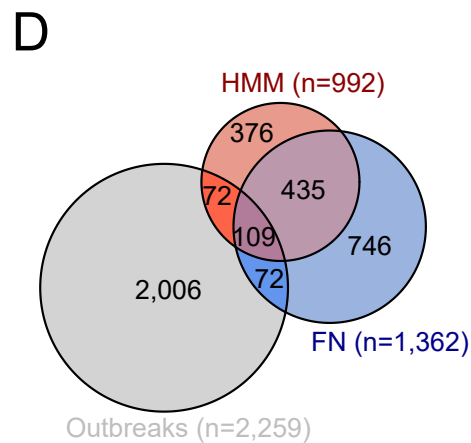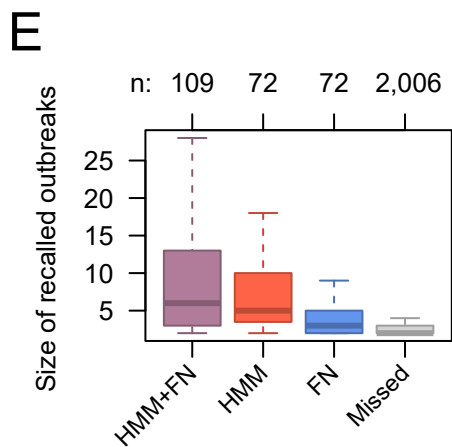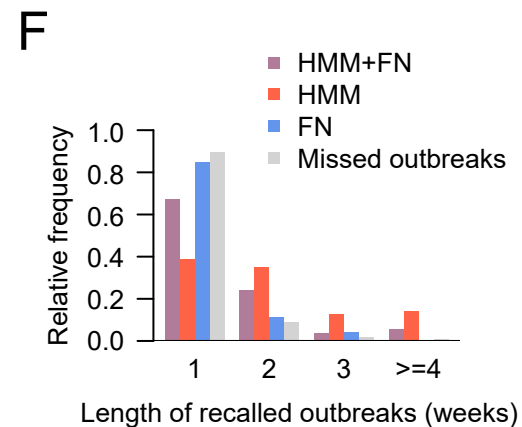

Supplement: pone.0267510.s003.pdf [file pone.0267510.s003.pdf]
